# Supplementary material for: Global snow water equivalent product derived from machine learning model trained with in situ measurement data
Source: Copernicus journal article supplement (doi:10.5194/essd-2024-349), 2025-01-28
Supplement: Supplementary file [file essd-2024-349-RC1-supplement.pdf]

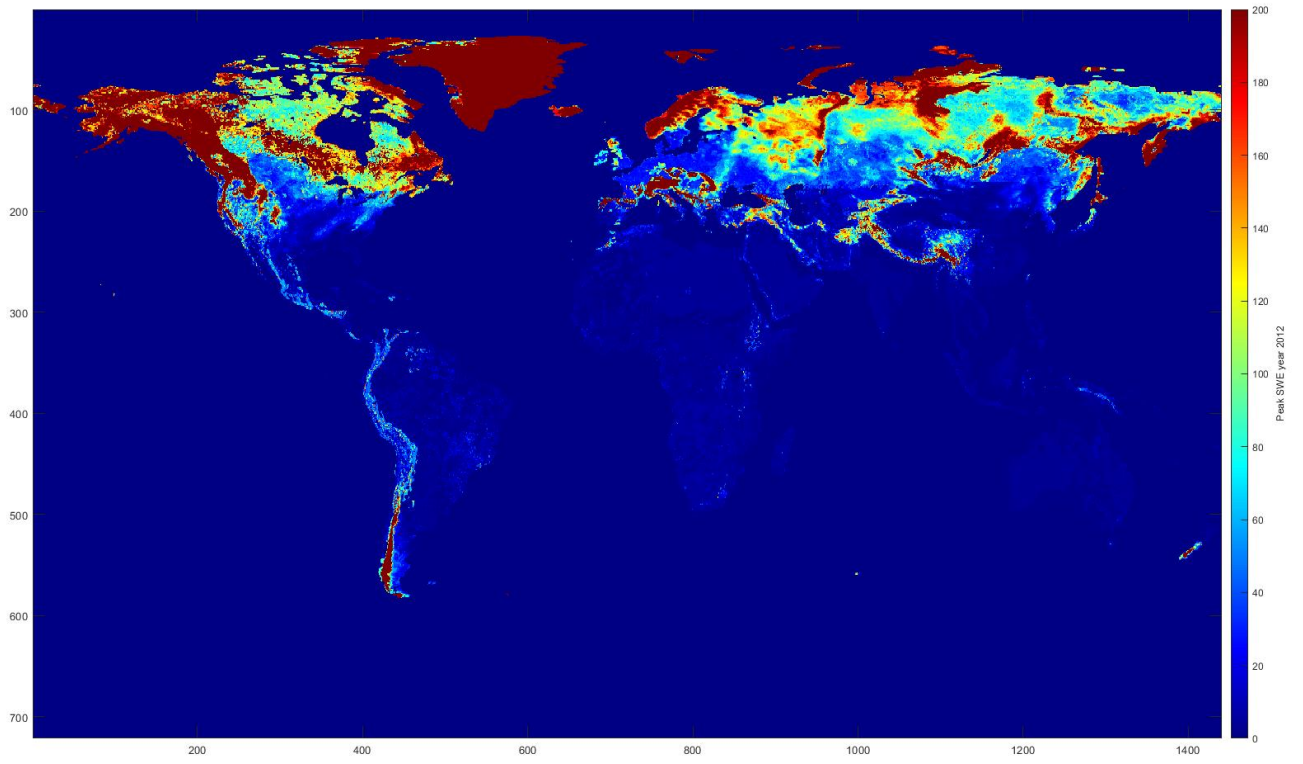

Figure 1

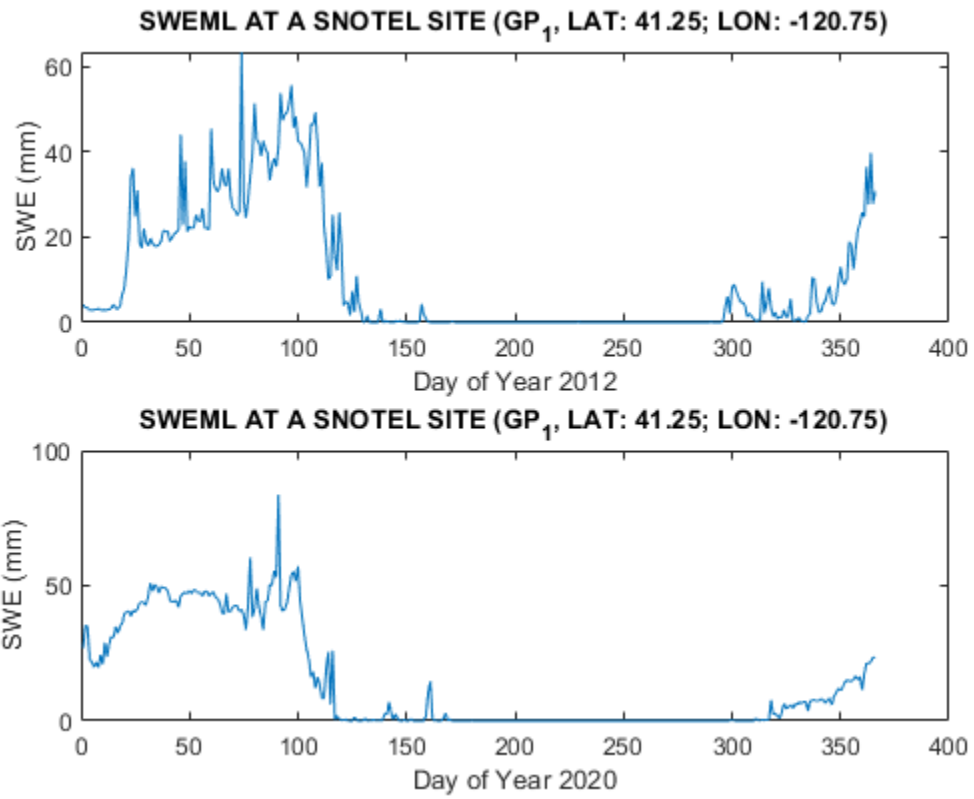

Figure 2

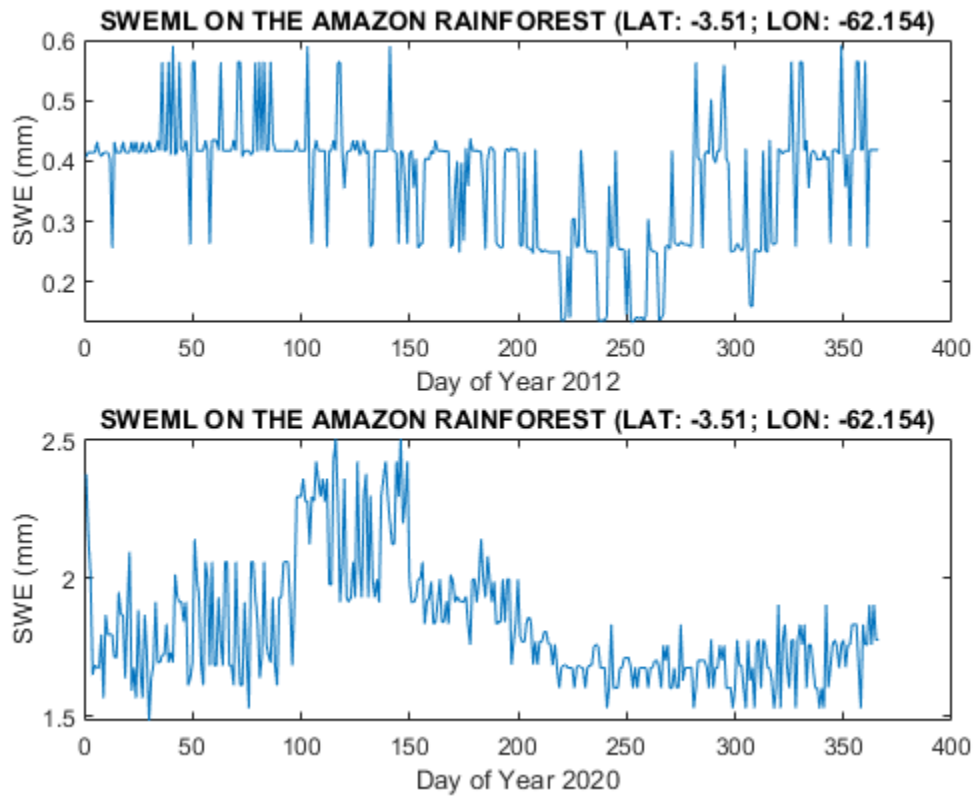

Figure 3

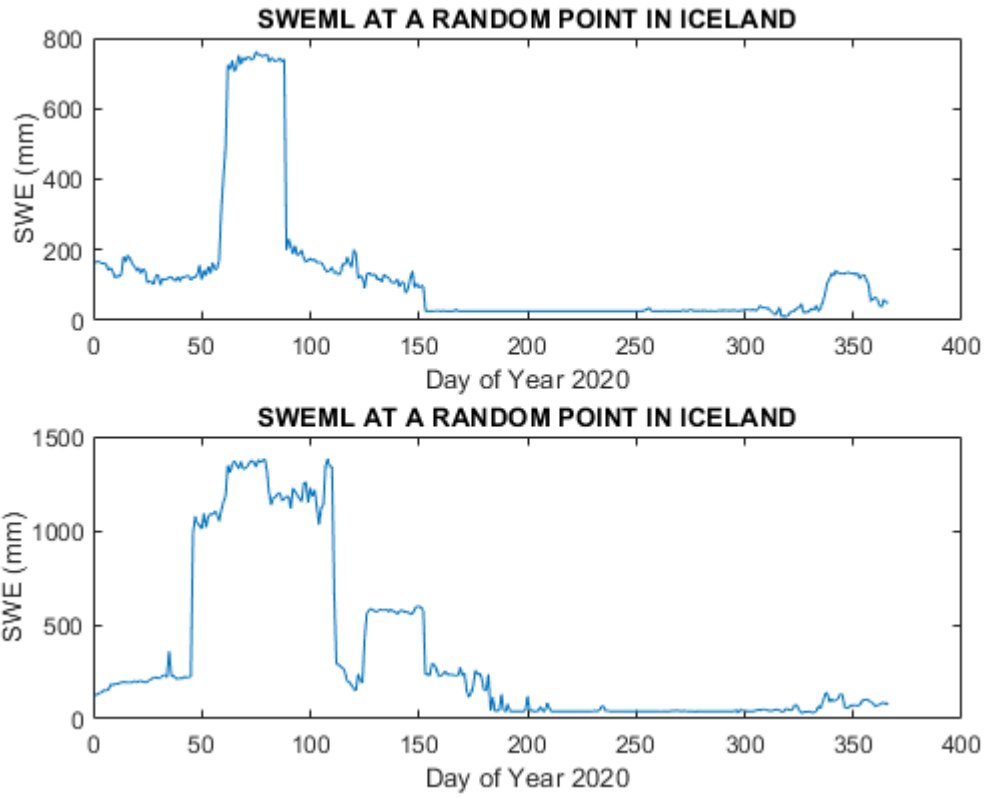

Figure 4

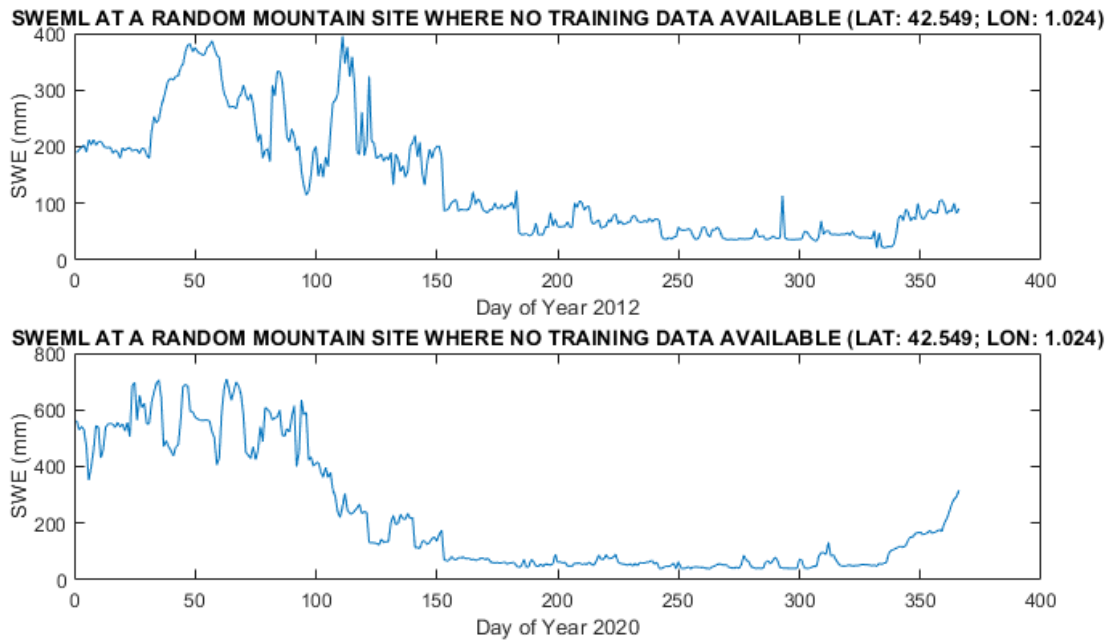

Figure 5
